# Supplementary material for: Shared Negative Experiences Lead to Identity Fusion via Personal Reflection
Source: PLoS One. 2015 Dec 23;10(12):e0145611. doi: 10.1371/journal.pone.0145611 (PMC4689389; doi:10.1371/journal.pone.0145611)
Supplement: S2 File — (XLSX) [file pone.0145611.s002.xlsx]

## Sheet: Northern_Ireland
Initials	Gender	Age	Ethnicity	Religion	Identity	Politics	Condition	Trauma1	Trauma2	Trauma3	Trauma4	Trauma5	Trauma6	Trauma7	Trauma8	Trauma9	Trauma10	Trauma11	Trauma12	sumTRAUMA	TraumaFrequency	Suffering	Ref_1_How often / do you think about these experiences?	Ref_2_How much have / these experiences been on your mind?	Reflection	VF1	VF2	VF3	VF4	VF5	VF6	VF7	avg_fusion
B.B	2	40	None	Protestant	Irish	Unionist	Unionist	1	1	1	1	1	1	1	1	1	1	1	1	12	4	4	6	6	6	5	5	5	5	5	5	5	5
EGR	1	43	White	Protestant	Northern Irish	Unionist	Unionist	1	1	0	0	0	0	1	0	0	0	0	0	3	4	4	6	6	6	4	4	4	4	4	4	4	4
JS	2	62	White	Protestant	British	Unionist	Unionist	1	1	1	1	1	1	1	1	1	1	1	1	12	4	4	6	5	5.5	6	5	5	5	6	5	5	5.28571
KW	2	65	White	Protestant	British, Ulster	Unionist	Unionist	0	1	0	0	1	1	1	1	0	0	0	0	5	4	4	6	5	5.5	4	5	5	4	3	4	5	4.28571
W J H	2	62	White	Protestant	British	Unionist	Unionist	1	0	0	0	1	1	1	1	0	0	0	0	5	4	4	6	6	6	6	5	5	5	5	5	6	5.28571
jm	1	59	White	Catholic	Irish	Republican	Republican	0	0	0	0	1	1	1	0	0	0	1	1	5	4	4	4	4	4	4	4	4	4	4	4	4	4
MP	2	45	White	Catholic	Irish	Republican	Republican	1	1	1	1	1	1	1	1	1	1	1	1	12	4	0	5	6	5.5	4	2	5	4	2	3	2	3.14286
pa	2	54	White	Catholic	Irish	Republican	Republican	1	1	1	1	1	1	1	1	1	1	1	1	12	4	4	6	6	6	6	6	6	6	6	6	5	5.85714
D ÌÒ B	2	73	Irish	Catholic	Irish	Republican	Republican	1	1	1	0	1	1	1	1	1	1	0	0	9	4	0	3	2	2.5	4	4	4	5	5	4	4	4.28571
pa	2	54	White	Catholic	Irish	Republican	Republican	1	1	1	1	1	1	1	1	1	1	1	1	12	4	4	6	6	6	6	6	6	6	6	6	6	6
rm	1	51	White	Catholic	Irish	Republican	Republican	1	1	1	1	1	1	1	1	1	1	1	1	12	4	0	3	3	3	4	2	3	2	1	1	2	2.14286
k l	1	63	White	Agnostic	Irish	Republican	Republican	0	1	0	0	1	1	1	1	0	1	1	1	8	4	0	6	6	6	4	3	4	2	2	2	1	2.57143
D McC	2	44	White	Catholic	Irish	Republican	Republican	0	1	0	0	1	1	1	1	0	0	0	0	5	4	0	3	3	3	6	6	6	6	2	6	4	5.14286
Rmck	1	51	White	Catholic	irish	Republican	Republican	1	1	1	1	1	1	1	1	1	1	1	1	12	4	0	5	5	5	5	5	5	5	5	5	4	4.85714
c	2	23	Sadasdasd	Catholic	Irish	Republican	Republican	1	1	1	1	1	1	1	1	1	1	1	1	12	4	4	3	3	3	4	4	4	4	4	4	4	4
mon	2	58	White	Catholic	Irish	Republican	Republican	1	1	1	0	1	1	1	1	1	1	1	1	11	4	0	6	6	6	4	4	4	4	3	4	4	3.85714
GS	1	62	White	Protestant	British	Unionist	Unionist	0	0	0	0	0	0	0	0	0	0	0	0	0	0	0	1	2	1.5	5	3	4	4	3	4	3	3.71429
M.E.F.	1	73	White	Protestant	British, Ulster	Unionist	Unionist	0	0	0	0	0	0	0	0	0	0	0	0	0	0	0	2	4	3	5	4	4	4	4	4	4	4.14286
F G	1	56	Female	Protestant	British, Ulster	Unionist	Unionist	0	0	0	0	0	0	0	0	0	0	0	0	0	0	0	5	5	5	5	3	3	3	3	3	3	3.28571
GLS	1	53	White	Protestant	British, Northen Irish	Unionist	Unionist	0	0	0	0	0	0	0	0	0	0	0	0	0	0	0	1	1	1	3	2	3	4	2	1	1	2.28571
n s	2	71	White	Protestant	Ulster	Unionist	Unionist	0	0	0	0	0	0	0	0	0	0	0	0	0	0	0	3	1	2	4	4	4	4	3	3	3	3.57143
hmm	1	65	White	Protestant	Northern Irish	Unionist	Unionist	0	0	0	0	0	0	0	0	0	0	0	0	0	0	0	2	3	2.5	2	2	2	3	1	1	1	1.71429
EAD	1	56	White	None	British	Unionist	Unionist	0	0	0	0	0	0	0	0	0	0	0	0	0	0	0	1	1	1	4	3	3	3	2	2	2	2.71429
DC	2	65	White	Agnostic	British	Unionist	Unionist	0	0	0	0	0	0	0	0	0	0	0	0	0	0	0	4	4	4	2	1	1	1	1	1	1	1.14286
JHL	2	65	White	None	British	Unionist	Unionist	0	0	0	0	0	0	0	0	0	0	0	0	0	0	0	1	1	1	3	1	1	1	1	1	1	1.28571
GRM	2	76	Caucasian	Protestant	British	Unionist	Unionist	0	0	0	0	0	0	0	0	0	0	0	0	0	0	0	3	2	2.5	5	5	5	5	4	4	5	4.71429
mh	2	61	White	None	Northern Irish	Unionist	Unionist	0	0	0	0	0	0	0	0	0	0	0	0	0	0	0	2	1	1.5	2	1	2	1	1	1	1	1.28571
vb	2	60	White	Protestant	British	Unionist	Unionist	0	0	0	0	0	0	0	0	0	0	0	0	0	0	0	3	2	2.5	2	2	2	2	1	1	1	1.57143
JS	2	44	White	Protestant	British	Unionist	Unionist	0	0	0	0	0	0	0	0	0	0	0	0	0	0	0	3	2	2.5	4	2	4	3	1	1	1	2.28571
TDR	2	47	White	Atheist	British	Unionist	Unionist	0	0	0	0	0	0	0	0	0	0	0	0	0	0	0	3	2	2.5	5	4	4	4	2	4	2	3.57143
ymcg	1	63	White	Protestant	British	Unionist	Unionist	0	0	0	0	0	0	0	0	0	0	0	0	0	0	0	1	1	1	4	1	2	4	1	2	1	2.14286
GF	2	57	White	Protestant	British, Northern Irish	Unionist	Unionist	0	0	0	0	0	0	0	0	0	0	0	0	0	0	0	2	2	2	4	4	4	4	3	3	3	3.57143
Js	1	71	White	Protestant	British, Ulster, Northern Irish	Unionist	Unionist	0	0	0	0	0	0	0	0	0	0	0	0	0	0	0	1	1	1	5	3	3	5	1	1	1	2.71429
bb	1	66	White	Protestant	British, Ulster	Unionist	Unionist	0	0	0	0	0	0	0	0	0	0	0	0	0	0	0	1	1	1	5	3	3	3	3	3	3	3.28571
SJB	2	71	White	Protestant	British	Unionist	Unionist	0	0	0	0	0	0	0	0	0	0	0	0	0	0	0	2	2	2	4	4	4	3	1	1	1	2.57143
s m	2	66	white anglo-saxon	Atheist	British, Northern Irish	Unionist	Unionist	0	0	0	0	0	0	0	0	0	0	0	0	0	0	0	1	1	1	5	4	4	4	2	3	2	3.42857
F G	1	56	FEMALE	Protestant	British	Unionist	Unionist	0	0	0	0	0	0	0	0	0	0	0	0	0	0	0	2	2	2	6	6	6	6	4	4	4	5.14286
e	2	52	White	Protestant	British	Unionist	Unionist	0	0	0	0	0	0	0	0	0	0	0	0	0	0	0	2	2	2	4	3	3	4	3	4	4	3.57143
LJ	1	60	White British	Protestant	British	Unionist	Unionist	0	0	0	0	0	0	0	0	0	0	0	0	0	0	0	3	2	2.5	2	2	1	1	1	1	1	1.28571
M.S	1	68	White	Atheist, Agnostic	Northern Irish	Unionist	Unionist	0	0	0	0	0	0	0	0	0	0	0	0	0	0	0	1	1	1	2	1	1	2	1	1	1	1.28571
JD	1	51	White	Protestant	British, Northern Irish	Unionist	Unionist	0	0	0	0	0	0	0	0	0	0	0	0	0	0	0	1	1	1	4	3	4	3	1	3	1	2.71429
sj	1	54	White	Protestant	British	Unionist	Unionist	0	0	0	0	0	0	0	0	0	0	0	0	0	0	0	3	4	3.5	4	4	4	4	3	3	3	3.57143
DBC	2	70	White	Protestant	British	Unionist	Unionist	0	0	0	0	0	0	0	0	0	0	0	0	0	0	0	1	1	1	5	5	4	4	3	5	4	4.28571
MS	2	47	White	Protestant	British	Unionist	Unionist	0	0	0	0	0	0	0	0	0	0	0	0	0	0	0	1	1	1	3	2	3	2	1	2	1	2
CLS	1	41	White	Protestant	British	Unionist	Unionist	0	0	0	0	0	0	0	0	0	0	0	0	0	0	0	1	1	1	6	5	5	6	3	4	4	4.71429
GS	1	70	Caucasian	Protestant	British, Northern Irish	Unionist	Unionist	0	0	0	0	0	0	0	0	0	0	0	0	0	0	0	2	2	2	4	3	3	4	3	3	3	3.28571
WG	2	64	Christian	Baptist	British	Unionist	Unionist	0	0	0	0	0	0	0	0	0	0	0	0	0	0	0	4	4	4	4	4	2	4	5	3	1	3.28571
MP	1	72	White	Agnostic	British	Unionist	Unionist	0	0	0	0	0	0	0	0	0	0	0	0	0	0	0	2	1	1.5	2	1	1	1	1	1	1	1.14286
MH	1	48	White	Protestant	British	Unionist	Unionist	0	0	0	0	0	0	0	0	0	0	0	0	0	0	0	4	3	3.5	4	3	3	3	2	2	2	2.71429
ISO	2	63	White	Protestant	British	Unionist	Unionist	0	0	0	0	0	0	0	0	0	0	0	0	0	0	0	1	1	1	4	2	2	2	1	2	1	2
c m	2	55	White	Protestant	British	Unionist	Unionist	0	0	0	0	0	0	1	0	0	0	1	0	2	0	0	3	2	2.5	5	4	5	5	4	4	5	4.57143
TS	2	65	White	Protestant	British	Unionist	Unionist	0	0	0	0	0	0	0	0	0	0	0	0	0	0	0	2	2	2	6	4	6	3	2	4	3	4
tr	2	48	White	Atheist	British	Unionist	Unionist	0	0	0	0	1	0	1	0	0	0	0	0	2	0	0	1	1	1	4	3	5	4	2	2	2	3.14286
ig	2	44	White	Protestant	British	Unionist	Unionist	0	0	0	0	0	0	0	0	0	0	0	0	0	0	0	1	1	1	5	4	4	4	4	4	4	4.14286
jhl	2	64	White	None	Northern Irish	Unionist	Unionist	0	0	0	0	0	0	0	0	0	0	0	0	0	0	0	4	3	3.5	4	2	2	1	2	1	1	1.85714
gl	2	41	White	Catholic	Dutch	Republican	Republican	0	0	0	0	0	0	0	0	0	0	0	0	0	0	0	5	4	4.5	2	1	2	1	1	2	1	1.42857
SH	2	40	White	Catholic	Irish	Republican	Republican	0	0	0	0	0	0	0	0	0	0	0	0	0	0	0	2	2	2	2	2	2	2	2	2	2	2
lg	1	48	White	Catholic	Irish	Republican	Republican	0	0	0	0	0	0	0	0	0	0	0	0	0	0	0	1	1	1	2	2	2	2	2	2	2	2
TNC	2	77	White Irish	None	Irish	Republican	Republican	0	0	0	0	0	0	0	0	0	0	0	0	0	0	0	2	2	2	4	3	4	4	2	3	2	3.14286
cg	1	50	White	Catholic	Irish	Republican	Republican	0	0	0	0	0	0	0	0	0	0	0	0	0	0	0	4	4	4	4	3	4	3	2	2	2	2.85714
CM	1	61	White	Catholic	Irish	Republican	Republican	0	0	0	0	0	0	0	0	0	0	0	0	0	0	0	4	5	4.5	2	2	4	4	4	4	4	3.42857
MMcK	1	52	White	Catholic	Irish	Republican	Republican	0	0	0	0	0	0	0	0	0	0	0	0	0	0	0	1	1	1	1	1	1	2	1	1	1	1.14286
RN	2	41	White	Catholic	Northern Irish	Republican	Republican	0	0	0	0	0	0	0	0	0	0	0	0	0	0	1	4	4	4	2	2	4	3	3	3	3	2.85714
sl	1	57	White	Catholic	Irish	Republican	Republican	0	0	0	0	0	0	0	0	0	0	0	0	0	0	0	2	1	1.5	1	1	1	1	1	2	1	1.14286
pd	1	40	White	Catholic	Northern Irish	Republican	Republican	0	0	0	0	0	0	0	0	0	0	0	0	0	0	0	1	1	1	2	1	2	1	1	1	1	1.28571
bm	1	43	White	Catholic	Irish	Republican	Republican	0	1	0	0	0	0	0	0	0	0	0	0	1	0	1	1	1	1	4	2	2	2	2	2	2	2.28571
MMD	1	55	White	Catholic	Northern Irish	Republican	Republican	0	0	0	0	0	0	1	0	0	0	0	0	1	0	0	1	1	1	4	2	2	3	1	3	1	2.28571
A.L	1	41	White	Catholic	Irish	Republican	Republican	0	0	0	0	0	0	0	0	0	0	0	0	0	0	0	1	1	1	4	3	4	3	2	2	2	2.85714
db	2	62	White English	Catholic	British	Republican	Republican	0	0	0	0	0	0	0	0	0	0	0	0	0	0	0	3	4	3.5	4	1	1	1	1	1	1	1.42857
Imn	2	50	White	Catholic	British	Republican	Republican	0	0	0	0	0	0	0	0	0	0	0	0	0	0	0	1	1	1	4	1	1	1	1	1	1	1.42857
A Q	1	56	Irish	Catholic	Irish	Republican	Republican	0	0	0	0	0	0	0	0	0	0	0	0	0	0	0	4	3	3.5	2	1	3	2	1	1	1	1.57143
ac	1	56	White	Catholic	Northern Irish	Republican	Republican	0	0	0	0	0	0	0	0	0	0	0	0	0	0	0	1	1	1	4	1	2	2	1	1	1	1.71429
KC	2	50	White	Catholic	British	Republican	Republican	0	0	0	0	0	0	0	0	0	0	0	0	0	0	0	1	1	1	5	3	4	4	5	3	3	3.85714
SW	2	44	White	Catholic, Agnostic	Irish	Republican	Republican	0	0	0	0	0	0	0	0	0	0	0	0	0	0	0	1	1	1	3	2	2	1	1	1	1	1.57143
CM	1	67	Anglo Saxon	Catholic	Irish	Republican	Republican	0	0	0	0	0	0	0	0	0	0	0	0	0	0	0	3	1	2	4	2	2	2	2	2	2	2.28571
JR	2	61	White	Catholic	British	Republican	Republican	0	0	0	0	0	0	0	0	0	0	0	0	0	0	0	1	1	1	2	2	2	2	2	2	2	2
AOK	1	41	White	Catholic	Irish	Republican	Republican	0	0	0	0	0	0	0	0	0	0	0	0	0	0	0	3	3	3	3	3	3	4	3	3	3	3.14286
mt	1	43	White	Catholic	Irish	Republican	Republican	0	0	0	0	0	0	0	0	0	0	0	0	0	0	0	2	2	2	4	3	4	2	1	3	3	2.85714
tb	2	44	White	Catholic	British, Irish, Northern Irish	Republican	Republican	0	0	0	0	0	0	0	0	0	0	0	0	0	0	0	1	1	1	2	1	1	1	1	1	1	1.14286
AL	1	41	White	Catholic	Irish	Republican	Republican	0	0	0	0	0	0	0	0	0	0	0	0	0	0	0	2	2	2	2	2	4	4	2	2	2	2.57143
SAD	2	56	White	None	British	Republican	Republican	0	0	0	0	1	0	1	0	0	0	0	0	2	0	0	1	1	1	4	1	1	1	1	1	1	1.42857
md	1	50	White	Catholic	Irish	Republican	Republican	0	0	0	0	0	0	0	0	0	0	0	0	0	0	0	1	1	1	2	1	1	1	1	1	1	1.14286
PD	1	43	White	Catholic	Northern Irish	Republican	Republican	0	0	0	0	0	0	0	0	0	0	0	0	0	0	0	1	1	1	2	1	2	2	2	2	2	1.85714
eas	1	40	Caucasian	Catholic, Protestant	American	Unionist	Unionist	0	1	1	0	0	0	1	0	1	1	0	0	5	3	2	4	4	4	2	2	2	1	1	2	2	1.71429
DA	2	54	White	Protestant	British	Unionist	Unionist	1	1	1	1	1	1	1	1	1	1	1	1	12	3	3	5	5	5	6	5	5	5	4	5	5	5
LM	1	54	White	Protestant	British	Unionist	Unionist	0	0	0	1	1	1	0	0	0	0	0	1	4	3	3	4	4	4	4	5	5	5	3	4	4	4.28571
Bj	2	57	White	Protestant	British	Unionist	Unionist	0	1	0	0	1	0	1	0	0	0	1	0	4	3	1	1	1	1	3	2	2	3	1	1	1	1.85714
g	2	52	White	Protestant	Ulster	Unionist	Unionist	0	0	0	0	0	0	0	0	0	0	0	0	0	3	2	4	4	4	5	4	5	5	5	5	5	4.85714
da	2	54	White	Protestant	British	Unionist	Unionist	1	1	1	1	1	1	1	1	1	1	1	1	12	3	4	5	4	4.5	6	5	5	4	4	5	5	4.85714
r k	2	69	White	Protestant	British, Ulster, Northern Irish	Unionist	Unionist	1	1	0	0	1	1	1	0	1	0	1	0	7	3	4	3	3	3	3	3	3	3	2	3	2	2.71429
Colin	2	34	White	Catholic	British	Unionist	Unionist	0	1	0	0	1	0	1	1	0	0	0	0	4	3	4	5	4	4.5	5	6	6	5	5	6	6	5.57143
m m	1	53	White	Protestant	British, Northern Irish	Unionist	Unionist	0	1	0	0	1	1	1	0	0	0	0	0	4	3	2	4	4	4	5	5	5	5	3	4	3	4.28571
rh	2	42	White	Protestant	Northern Irish	Unionist	Unionist	0	1	0	0	0	0	1	0	0	0	0	0	2	3	1	4	4	4	2	1	2	4	1	1	1	1.71429
GD	1	50	White	Protestant	Northern Irish	Unionist	Unionist	0	1	0	1	1	1	0	0	0	0	0	0	4	3	2	1	1	1	3	3	3	3	3	3	3	3
RAK	2	61	White	None	British	Unionist	Unionist	0	0	0	0	0	0	0	0	0	0	0	0	0	3	1	4	4	4	3	2	2	2	2	1	1	1.85714
wfg	2	83	White	Protestant	British	Unionist	Unionist	0	1	1	0	1	0	1	1	1	1	0	0	7	3	2	3	3	3	4	4	5	5	3	4	4	4.14286
CRB	2	58	White	Protestant	British	Unionist	Unionist	1	1	1	0	1	1	1	1	1	1	0	1	10	3	3	3	4	3.5	4	4	4	4	5	5	4	4.28571
a.c.	2	64	White	Agnostic	British, Northern Irish	Unionist	Unionist	1	1	1	0	1	0	1	0	1	0	0	0	6	3	3	3	3	3	3	3	3	3	3	3	3	3
DF	2	48	White	Catholic	Irish	Republican	Republican	0	1	0	0	1	1	1	1	0	0	0	0	5	3	Yes	3	3	3	4	3	4	3	2	4	3	3.28571
moh	2	49	White	Catholic	Irish	Republican	Republican	0	0	0	0	1	0	1	1	0	1	0	0	4	3	Yes	4	4	4	5	5	4	4	5	5	4	4.57143
mm	2	57	White	Catholic	Ulster	Republican	Republican	1	1	1	0	1	1	1	1	1	1	1	1	11	3	4	6	5	5.5	5	5	5	4	3	4	3	4.14286
mm	1	55	White	Catholic	Irish	Republican	Republican	0	0	0	0	0	0	0	0	0	0	0	0	0	3	0	5	4	4.5	4	4	4	3	2	2	2	3
jpd	2	47	White	Catholic	Irish	Republican	Republican	0	0	0	0	1	0	0	0	0	0	0	0	1	3	0	5	2	3.5	4	3	5	4	2	4	3	3.57143
R.N.	2	41	White	Catholic	British	Republican	Republican	0	0	0	0	0	0	0	0	0	0	0	0	0	3	0	3	4	3.5	3	2	3	3	2	3	3	2.71429
mon	2	57	White	Catholic	Irish	Republican	Republican	1	1	1	1	1	1	1	1	1	1	1	1	12	3	0	5	5	5	5	4	4	4	3	3	3	3.71429
D F	2	49	White	Catholic	Irish	Republican	Republican	1	1	1	0	1	1	1	1	0	0	0	0	7	3	0	3	2	2.5	3	3	4	4	1	4	4	3.28571
con	1	44	White	Catholic	Irish	Republican	Republican	0	1	1	0	1	0	1	0	1	0	0	0	5	3	0	1	2	1.5	1	1	2	1	1	1	1	1.14286
cd	2	54	White	Catholic	Irish	Republican	Republican	1	1	1	0	1	1	1	1	1	1	1	0	10	3	0	4	4	4	4	4	4	4	3	5	4	4
MMC	1	41	White	Catholic	Northern Irish	Republican	Republican	1	1	1	1	1	1	1	1	1	1	1	1	12	3	0	6	6	6	1	4	1	1	1	1	1	1.42857
S McK	1	42	White	Catholic	Irish	Republican	Republican	1	1	1	0	1	1	1	1	1	1	0	1	10	3	0	5	5	5	1	1	1	1	1	1	1	1
pc	2	42	White	Catholic	Irish	Republican	Republican	1	1	1	1	1	1	1	1	1	1	1	1	12	3	0	5	5	5	6	3	4	4	4	4	4	4.14286
gj	2	47	White	Catholic	Irish	Republican	Republican	1	1	1	1	1	1	1	1	1	1	1	1	12	3	0	4	4	4	5	5	5	4	2	4	3	4
SD	2	43	Irish	Catholic	Irish	Republican	Republican	0	1	0	1	1	1	1	1	0	0	1	1	8	3	0	5	2	3.5	3	2	4	3	1	3	1	2.42857
nr	2	69	White	Catholic	Irish	Republican	Republican	1	1	1	0	1	1	1	1	1	1	0	0	9	3	0	4	4	4	3	3	3	3	3	2	2	2.71429
SD	2	49	White	Catholic	Irish	Republican	Republican	0	1	1	0	1	1	1	1	1	1	1	1	10	3	1	4	3	3.5	4	4	4	4	5	5	5	4.42857
Eithne Hanson	1	49	White	Catholic	Irish	Republican	Republican	0	0	0	1	0	0	0	0	0	0	1	0	2	3	0	3	3	3	1	1	1	1	1	1	1	1
TD	2	49	White	Catholic	Irish	Republican	Republican	0	1	1	0	1	0	1	0	1	0	1	0	6	3	0	6	5	5.5	5	5	6	5	4	5	5	5
D ÌÒ B	2	73	Celtic	Catholic	Irish	Republican	Republican	1	1	1	1	1	0	1	1	1	0	0	0	8	3	0	3	3	3	6	6	6	6	5	5	3	5.28571
nm	1	49	White	Catholic	irish	Republican	Republican	0	0	0	0	0	0	0	0	0	0	0	0	0	3	0	4	3	3.5	6	1	6	1	1	1	1	2.42857
SB	2	46	Caucasian	Pagan	Irish	Republican	Republican	0	1	0	1	1	1	1	1	1	1	1	1	10	3	0	4	4	4	4	3	4	3	2	3	2	3
sd	1	40	White	Catholic	Irish	Republican	Republican	0	0	0	0	1	1	1	1	0	0	0	0	4	3	0	4	4	4	4	4	5	3	1	3	1	3
l.r	2	72	Irish	Catholic	Irish	Republican	Republican	1	1	1	0	1	1	1	1	1	1	1	0	10	3	0	3	3	3	6	5	6	6	2	6	2	4.71429
vregr	2	40	regreg	Catholic	British	Unionist	Unionist	0	0	0	0	0	0	0	0	0	0	0	0	0	2	2	2	2	2	3	3	3	3	3	3	3	3
TS	2	65	White	Protestant	British	Unionist	Unionist	0	0	0	0	1	0	0	0	0	0	0	0	1	2	1	4	4	4	5	4	6	4	4	5	4	4.57143
r t	2	46	White	Protestant	British	Unionist	Unionist	1	1	1	0	1	0	1	1	1	0	1	0	8	2	2	3	2	2.5	2	2	2	1	1	1	1	1.42857
IW	2	48	White	Protestant	British, Ulster, Northern Irish	Unionist	Unionist	0	0	0	0	0	0	1	0	0	0	0	0	1	2	1	5	5	5	5	4	4	4	3	4	4	4
L R	1	58	White	Protestant	British	Unionist	Unionist	0	1	0	0	1	0	1	0	1	0	0	0	4	2	1	4	4	4	2	2	2	2	2	2	2	2
F B	2	61	White	Protestant	British, Ulster	Unionist	Unionist	0	1	0	0	0	0	1	0	1	0	0	0	3	2	2	2	2	2	6	6	6	6	5	6	6	5.85714
tm	1	41	White	Atheist	Northern Irish	Unionist	Unionist	0	0	0	0	0	0	0	0	0	0	0	0	0	2	1	2	2	2	4	2	2	3	2	2	2	2.42857
Ja	2	68	White	Protestant	British	Unionist	Unionist	0	0	0	0	0	0	0	0	0	0	0	0	0	2	2	3	4	3.5	2	1	2	1	2	3	4	2.14286
AS	1	50	White	Protestant	British, Ulster	Unionist	Unionist	0	0	0	0	1	1	1	0	0	0	0	0	3	2	1	4	4	4	5	4	4	5	4	4	5	4.42857
Mh	2	46	White	Atheist	British	Unionist	Unionist	1	1	1	0	1	1	1	1	1	1	0	0	9	2	2	3	3	3	4	4	4	4	2	2	1	3
GG	2	44	White	Protestant	British, Irish, Northern Irish	Unionist	Unionist	0	0	0	1	1	1	0	0	0	0	1	0	4	2	2	3	2	2.5	3	3	2	4	1	2	4	2.71429
gt	2	48	White	Protestant	British	Unionist	Unionist	0	0	0	0	0	0	1	1	0	0	0	0	2	2	1	3	2	2.5	4	3	4	3	3	3	3	3.28571
ISO	2	63	White	Protestant	British	Unionist	Unionist	0	1	0	0	0	0	1	1	0	0	0	0	3	2	1	2	1	1.5	4	3	3	3	2	2	2	2.71429
EB	2	47	White	Protestant	Ulster, Northern Irish	Unionist	Unionist	1	1	0	0	1	0	1	1	0	0	0	0	5	2	4	3	3	3	6	3	4	6	1	5	5	4.28571
PB	2	56	White	Protestant	Northern Irish	Unionist	Unionist	0	1	0	0	1	0	1	0	0	0	0	0	3	2	1	1	1	1	3	2	3	2	1	3	2	2.28571
tw	2	43	White	Protestant	British	Unionist	Unionist	0	0	0	0	1	0	1	1	1	1	0	0	5	2	1	3	2	2.5	3	3	3	3	1	4	3	2.85714
ja	2	47	White	Protestant	British	Unionist	Unionist	1	1	0	0	0	0	0	0	0	0	0	1	3	2	2	4	4	4	5	5	5	5	5	5	5	5
RNL	2	65	White	Protestant	British, Northern Irish	Unionist	Unionist	0	0	0	0	0	0	0	0	0	0	0	0	0	2	1	2	1	1.5	5	3	4	4	2	3	2	3.28571
md	1	45	White	Catholic	Irish	Republican	Republican	0	1	1	0	1	0	1	1	0	0	1	0	6	2	Yes	3	4	3.5	1	1	1	1	1	1	1	1
mcpa	1	61	White	Catholic	British	Republican	Republican	0	0	0	0	0	0	0	0	0	0	0	0	0	2	0	3	2	2.5	1	1	1	1	1	1	1	1
gmcc	2	57	White	Catholic	Irish	Republican	Republican	0	1	0	0	1	1	1	1	0	0	0	0	5	2	0	4	3	3.5	4	2	3	2	1	4	2	2.57143
CMCk	1	41	White	Catholic	Northern Irish	Republican	Republican	0	0	0	0	0	0	0	0	0	0	0	0	0	2	0	3	3	3	3	2	2	2	1	1	1	1.71429
mb	1	45	White	Catholic	Irish	Republican	Republican	0	1	0	0	1	0	1	0	0	0	0	0	3	2	0	2	1	1.5	1	1	1	1	1	1	1	1
moh	2	49	White	Catholic	British	Republican	Republican	0	1	1	0	1	1	1	1	1	1	0	0	8	2	0	2	3	2.5	2	1	2	1	1	1	1	1.28571
gm	2	67	White	Catholic	Irish, Northern Irish	Republican	Republican	0	1	1	0	1	1	1	1	1	1	0	0	8	2	0	3	3	3	1	1	1	1	1	1	1	1
gmcc	2	57	White	Catholic	irish	Republican	Republican	0	0	0	0	0	0	0	0	0	0	0	0	0	2	0	2	2	2	4	2	4	2	1	3	1	2.42857
cmcc	2	42	White	Catholic	Irish	Republican	Republican	1	1	0	0	1	1	1	1	0	0	0	0	6	2	0	2	2	2	2	1	3	2	1	3	2	2
AB	2	44	White	Atheist	Irish	Republican	Republican	1	1	1	1	1	0	1	1	1	1	1	0	10	2	0	5	5	5	5	2	6	4	2	3	3	3.57143
KJD	2	58	White	Protestant	British	Unionist	Unionist	0	1	0	0	0	0	1	0	0	0	0	0	2	1	1	2	2	2	6	6	6	6	3	4	5	5.14286
TS	2	65	White	Protestant	British	Unionist	Unionist	0	0	0	0	0	0	0	0	0	0	0	0	0	1	0	1	3	2	5	5	6	5	4	6	4	5
cmcb	2	55	British	Protestant	British, Northen Irish	Unionist	Unionist	0	1	0	0	0	0	1	1	0	0	0	0	3	1	2	4	4	4	5	5	6	6	5	5	5	5.28571
l k	2	45	White	Protestant	British, Irish, Ulster, Northern Irish	Unionist	Unionist	1	1	0	0	1	1	1	1	0	0	0	1	7	1	1	2	2	2	5	5	6	5	3	5	5	4.85714
CH	1	54	White	Protestant	British, Ulster, Northern Irish	Unionist	Unionist	0	0	0	0	1	0	1	0	0	0	0	0	2	1	1	2	2	2	4	2	3	4	1	2	1	2.42857
AM	1	49	White	Protestant	British	Unionist	Unionist	0	0	0	0	0	0	0	0	0	0	0	0	0	1	0	4	4	4	4	4	4	4	4	3	3	3.71429
BT	2	44	White	Protestant	British, Northern Irish	Unionist	Unionist	0	0	0	0	0	0	0	0	0	0	0	0	0	1	0	2	1	1.5	5	4	4	4	3	3	2	3.57143
AR	2	51	White	Protestant	Northern Irish	Unionist	Unionist	0	0	0	0	0	0	0	0	0	0	0	0	0	1	1	4	3	3.5	4	4	4	5	2	3	3	3.57143
DP	2	62	White	Protestant	British	Unionist	Unionist	0	1	0	0	1	1	1	1	0	0	0	0	5	1	1	6	5	5.5	4	4	4	4	4	4	4	4
T.R.	2	48	White Caucasian	Gnostic	British	Unionist	Unionist	0	0	0	0	1	0	1	0	0	0	0	0	2	1	1	2	2	2	5	4	4	4	3	4	4	4
GD	2	65	Christian	Protestant	British	Unionist	Unionist	0	0	0	0	1	0	1	0	0	0	0	0	2	1	1	2	2	2	5	4	6	4	2	4	4	4.14286
M A	2	50	White	Christian	Northern Irish	Unionist	Unionist	0	0	0	0	0	1	1	1	0	0	0	0	3	1	0	4	3	3.5	3	3	3	3	2	3	2	2.71429
KM	2	55	White	Protestant	British	Unionist	Unionist	0	0	0	0	0	0	0	0	0	0	0	0	0	1	1	4	5	4.5	4	3	3	3	2	3	3	3
HS	1	40	White European	Catholic	Irish	Unionist	Unionist	0	0	0	0	0	1	0	0	0	0	0	0	1	1	1	5	4	4.5	4	2	2	4	2	2	2	2.57143
i	2	44	White	Protestant	British	Unionist	Unionist	0	0	0	0	0	0	0	0	0	0	0	0	0	1	0	1	1	1	4	3	4	4	3	4	4	3.71429
G S	2	66	White	Protestant	British	Unionist	Unionist	0	0	0	0	0	0	0	0	0	0	0	0	0	1	1	1	2	1.5	4	4	3	3	2	2	2	2.85714
bf	2	39	European	Protestant	British	Unionist	Unionist	1	1	1	0	1	1	1	1	1	1	0	0	9	1	1	3	3	3	5	5	5	4	3	4	4	4.28571
E McK	1	51	White	Protestant	British, Ulster, Northern Irish	Unionist	Unionist	0	0	0	0	0	0	0	0	0	0	0	0	0	1	0	2	2	2	3	2	3	3	2	3	2	2.57143
PB	2	56	White	Protestant	British	Unionist	Unionist	0	1	0	0	0	0	1	0	0	0	0	0	2	1	1	1	1	1	3	2	2	2	2	2	2	2.14286
jm	2	46	White	Protestant	British	Unionist	Unionist	0	1	0	0	0	0	1	1	0	0	0	0	3	1	1	4	4	4	5	5	5	5	4	4	4	4.57143
d l	2	42	White	Protestant	British	Unionist	Unionist	0	0	0	0	0	0	0	0	0	0	0	0	0	1	0	2	2	2	4	6	6	6	3	6	5	5.14286
DRT	2	66	White European	Protestant	British	Unionist	Unionist	0	0	0	0	1	0	0	0	0	0	0	0	1	1	1	5	5	5	4	2	2	3	3	4	4	3.14286
AJ	1	45	White	Protestant	British	Unionist	Unionist	1	0	0	0	0	0	1	1	0	0	0	0	3	1	1	4	4	4	5	4	5	4	3	4	4	4.14286
kps	2	55	British	Protestant	British	Unionist	Unionist	0	1	0	0	0	0	0	0	0	0	0	0	1	1	0	4	3	3.5	5	4	4	4	3	4	4	4
JT	1	67	Caucasian	Protestant	British, Northern Irish	Unionist	Unionist	0	0	0	0	0	0	0	0	0	0	0	0	0	1	1	1	1	1	3	2	3	2	2	3	2	2.42857
PD	1	42	White	Protestant	irish	Unionist	Unionist	0	0	0	0	0	0	1	1	0	0	0	0	2	1	1	2	1	1.5	1	1	3	2	1	1	1	1.42857
GD	2	65	White	Protestant	British	Unionist	Unionist	0	0	0	0	1	0	1	0	0	0	0	0	2	1	0	4	4	4	5	5	5	4	2	4	4	4.14286
IC	2	54	White	Protestant	British	Unionist	Unionist	0	0	0	0	0	0	0	0	0	0	0	0	0	1	1	4	4	4	6	5	5	5	4	5	5	5
GJM	2	57	White	Catholic	Irish	Republican	Republican	0	0	0	0	1	0	0	0	0	0	0	0	1	1	0	2	2	2	4	2	4	2	1	2	1	2.28571
AR	2	55	White	Catholic	Irish	Republican	Republican	0	0	0	0	0	0	0	0	0	0	0	0	0	1	0	4	4	4	4	2	4	4	2	3	3	3.14286
jpd	2	47	White	Catholic	Irish	Republican	Republican	0	0	0	0	1	1	0	0	0	0	0	0	2	1	0	3	2	2.5	3	3	5	2	1	4	3	3
AC	1	56	White	Catholic	Northern Irish	Republican	Republican	0	0	0	0	0	0	0	0	0	0	1	0	1	1	0	1	1	1	4	1	2	1	1	1	1	1.57143
ms	2	51	White	Atheist	Irish	Republican	Republican	0	0	0	0	0	0	0	0	0	0	0	0	0	1	0	1	1	1	1	1	1	1	1	1	1	1
FJ	2	50	White	Catholic	Northern Irish	Republican	Republican	0	1	0	0	0	1	1	1	0	1	0	0	5	1	0	2	2	2	4	4	4	3	3	3	3	3.42857
ECF	2	41	White caucasian	Agnostic	Irish	Republican	Republican	0	0	0	0	0	0	0	0	1	1	0	0	2	1	0	4	4	4	5	4	4	4	3	4	4	4
jm	2	71	White	Catholic	Irish	Republican	Republican	0	0	0	0	0	0	0	0	0	0	0	0	0	1	0	1	1	1	4	4	4	3	3	3	3	3.42857
SD	1	40	White	Catholic	Northern Irish	Republican	Republican	0	0	0	0	1	0	1	0	0	0	0	0	2	1	0	4	5	4.5	4	4	4	4	2	3	1	3.14286
hw	1	45	Irish	Catholic	irish	Republican	Republican	0	1	0	0	0	0	1	1	0	0	1	0	4	1	0	3	3	3	2	2	5	3	1	2	3	2.57143
CMcK	1	41	White	Catholic	Northern Irish	Republican	Republican	0	0	0	0	0	0	0	0	0	0	0	0	0	1	0	5	5	5	2	2	2	2	2	2	2	2
MMD	1	55	White	Catholic	Northern Irish	Republican	Republican	0	0	0	0	1	1	0	0	0	0	0	0	2	1	0	1	1	1	4	3	3	2	1	2	2	2.42857
df	2	49	White	Catholic	Irish	Republican	Republican	0	1	0	0	0	0	0	0	0	0	0	0	1	1	0	2	2	2	4	3	3	4	2	4	3	3.28571
rfw	2	77	White Irish	Catholic	Irish	Republican	Republican	0	1	0	0	0	0	1	0	0	0	0	0	2	1	0	2	2	2	4	4	5	4	3	3	3	3.71429
jd	2	47	White	Catholic	Irish	Republican	Republican	0	0	0	0	0	0	0	0	0	0	0	0	0	1	0	3	3	3	1	1	4	1	1	3	2	1.85714
sh	2	40	White	Catholic	Irish	Republican	Republican	0	1	0	0	0	0	0	0	1	1	0	0	3	1	0	2	2	2	4	4	4	4	2	2	2	3.14286
gf	2	45	White	Catholic	Irish	Republican	Republican	0	1	1	0	1	1	1	1	1	1	1	1	10	1	0	1	1	1	2	2	2	1	1	1	2	1.57143
CO'N	1	44	White	Catholic	Irish	Republican	Republican	0	0	0	0	1	0	1	0	0	0	0	0	2	1	0	1	1	1	2	2	3	1	1	1	1	1.57143
DG	2	42	White	Catholic, Atheist	Irish	Republican	Republican	1	1	0	1	1	1	1	1	1	0	1	1	10	1	0	2	2	2	2	2	3	2	1	2	1	1.85714
S Mc K	1	70	White	Catholic	Northern Irish	Republican	Republican	0	0	0	0	0	0	0	0	0	0	0	0	0	1	0	2	2	2	3	2	3	4	2	2	2	2.57143
AMcD	1	54	White Caucasian	Catholic	Northern Irish	Republican	Republican	0	0	0	0	0	0	1	0	1	0	0	0	2	1	0	4	4	4	3	3	3	2	1	4	3	2.71429
mmm	2	47	White	Catholic	Irish	Republican	Republican	0	0	0	0	0	0	0	0	0	0	0	0	0	1	0	4	4	4	4	4	4	4	4	3	3	3.71429
jp	2	47	White	Catholic	Irish	Republican	Republican	0	0	0	0	0	0	0	0	0	0	0	0	0	1	0	3	3	3	2	3	3	2	1	2	2	2.14286

## Sheet: Sheet1
Key
Ref_1
1 = I have only thought about them a little
6 = I have spent many years reflecting
Ref_2
1 = I have thought about them sporadically
6 = They're always on my mind
Fus_Q
1 = Strongly disagree
2 = Disagree
3 = Somewhat disagree
4 = Somewhat agree
5 = Agree
6 = Strongly agree
